# Supplementary material for: Application of Response Surface Methodology to Optimize Coagulation Treatment Process of Urban Drinking Water Using Polyaluminium Chloride
Source: MDPI journal article supplement (doi:10.3390/w15050853), 2023-02-22
Supplement: s1 [file s1]

## SUPPLEMENTARY INFORMATION

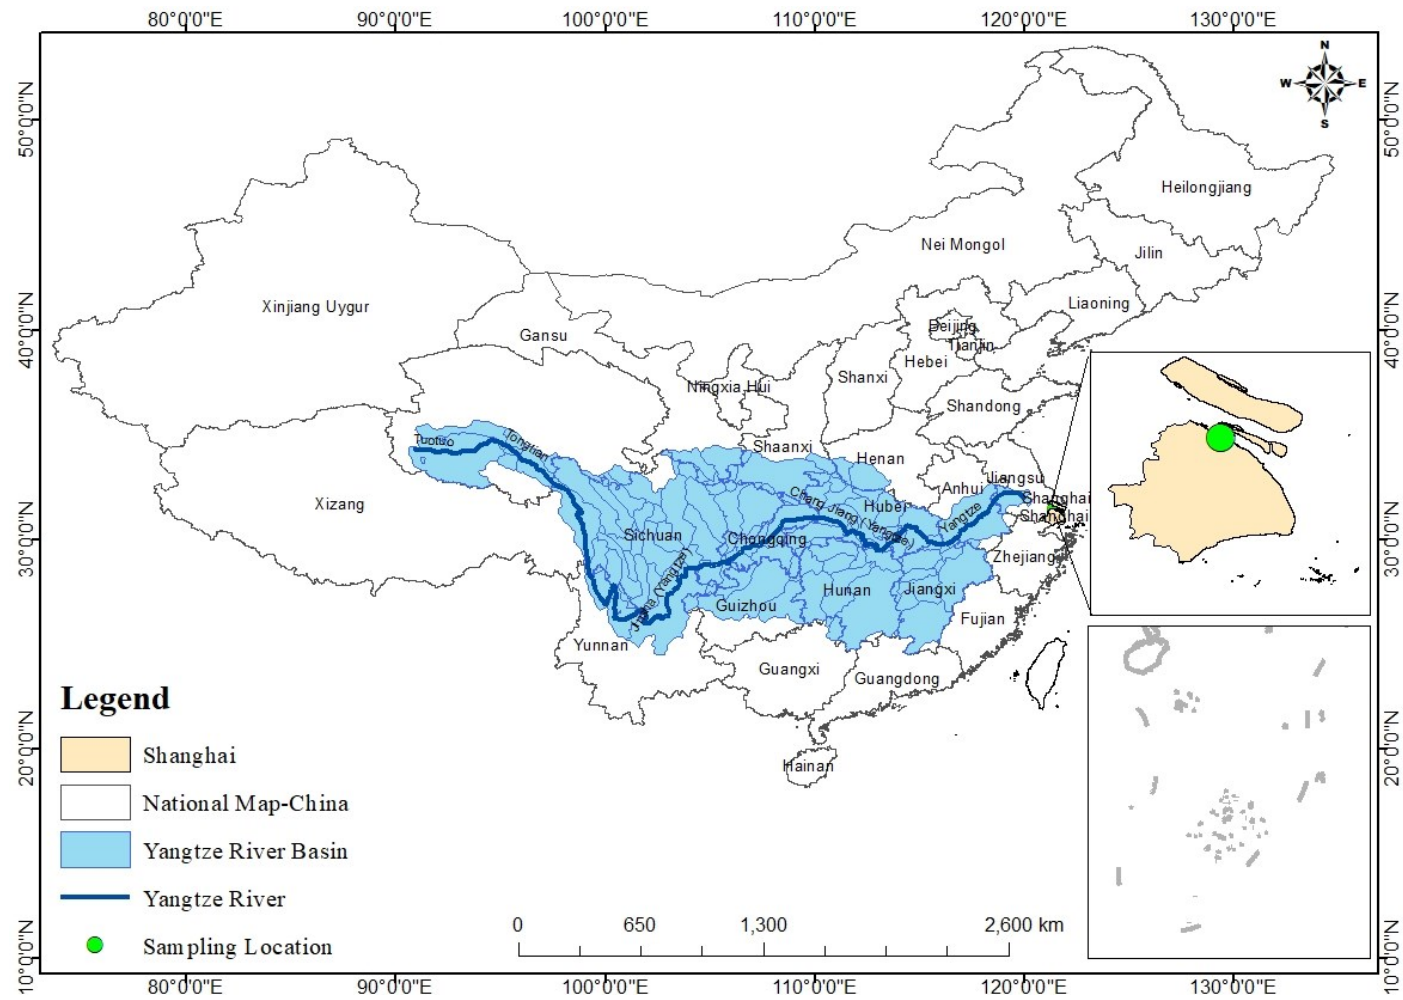

Figure S1: Sampling Location

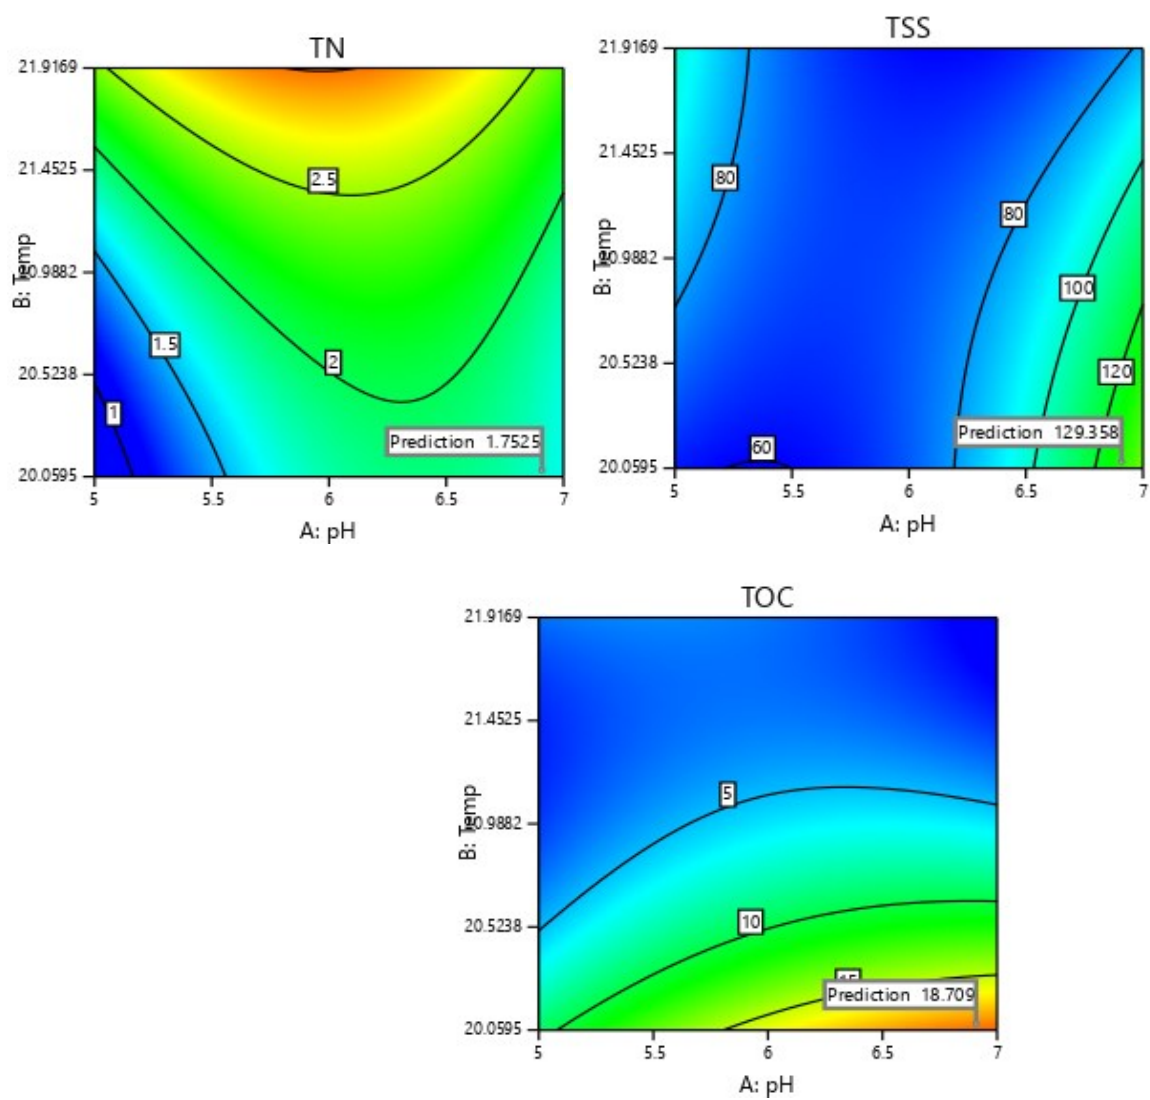

**Figure S2:** Graphical prediction plots.

**Table S1:** Box Behnken Design

| Run | Factor 1<br>pH | Factor 2<br>Temp | Factor 3<br>Dosage | Response 1<br>TOC | Response 2<br>TN | Response 3<br>TSS |
|-----|----------------|------------------|--------------------|-------------------|------------------|-------------------|
| 1   | 6              | 21               | 42.5               | 2.02              | 1.69             | 97.83             |
| 2   | 6              | 21               | 42.5               | 1.54              | 1.43             | 65.25             |
| 3   | 5              | 21               | 80                 | 1.74              | 1.45             | 122.16            |
| 4   | 7              | 21               | 80                 | 1.24              | 1.12             | 190.25            |
| 5   | 6              | 20               | 5                  | 21.36             | 1.41             | 77.555            |
| 6   | 6              | 22               | 80                 | 5.55              | 2.28             | 110.63            |
| 7   | 6              | 21               | 42.5               | 8.81              | 3.23             | 72.783            |
| 8   | 6              | 22               | 5                  | 4.99              | 3.19             | 60                |
| 9   | 7              | 21               | 5                  | 2.77              | 2.76             | 120.83            |
| 10  | 6              | 20               | 80                 | 2.64              | 3.21             | 131.86            |
| 11  | 5              | 22               | 42.5               | 2.97              | 2.53             | 114.5             |
| 12  | 5              | 20               | 42.5               | 3.755             | 1.48             | 71.5              |
| 13  | 5              | 21               | 5                  | 3.53              | 1.48             | 80.66             |
| 14  | 7              | 20               | 42.5               | 18.39             | 1.44             | 141.86            |
| 15  | 7              | 22               | 42.5               | 3.33              | 1.37             | 86.46             |

Table S2: ANOVA Results

| Source         | TOC            |    |             |         |         | TN             |    |             |         |         | TSS            |    |             |         |         |
|----------------|----------------|----|-------------|---------|---------|----------------|----|-------------|---------|---------|----------------|----|-------------|---------|---------|
|                | Sum of Squares | df | Mean Square | F-value | p-value | Sum of Squares | df | Mean Square | F-value | p-value | Sum of Squares | df | Mean Square | F-value | p-value |
|                |                |    |             |         | 0.314   | 0.007          |    | 0.007       | 0.011   | 0.918   | 2833.          |    | 2833.       |         |         |
| A-pH           | 23.6           | 1  | 23.6        | 1.25    | 3       | 7              | 1  | 7           | 7       | 1       | 92             | 1  | 92          | 11.64   | 0.019   |
| B-Temp         | 107.2          |    | 107.2       |         | 0.062   | 0.422          |    | 0.422       | 0.641   | 0.459   | 327.4          |    | 327.4       |         | 0.298   |
| C-Dosage       | 4              | 1  | 4           | 5.68    | 9       | 4              | 1  | 4           | 2       | 6       | 9              | 1  | 9           | 1.35    | 4       |
|                |                |    |             |         | 0.140   | 0.074          |    | 0.074       | 0.113   | 0.749   | 5824.          |    | 5824.       |         | 0.004   |
|                | 57.8           | 1  | 57.8        | 3.06    | 6       | 8              | 1  | 8           | 5       | 9       | 53             | 1  | 53          | 23.93   | 5       |
|                |                |    |             |         | 0.161   | 0.313          |    | 0.313       |         | 0.520   | 2420.          |    | 2420.       |         | 0.025   |
| AB             | 50.88          | 1  | 50.88       | 2.7     | 5       | 6              | 1  | 6           | 0.476   | 9       | 48             | 1  | 48          | 9.95    | 3       |
|                | 0.017          |    | 0.017       | 0.000   |         | 0.641          |    | 0.641       | 0.973   | 0.369   | 194.8          |    | 194.8       | 0.800   | 0.411   |
| AC             | 3              | 1  | 3           | 9       | 0.977   | 3              | 1  | 3           | 5       | 1       | 4              | 1  | 4           | 6       | 9       |
|                |                |    |             |         | 0.077   |                |    |             |         | 0.157   |                |    |             | 0.013   | 0.910   |
| BC             | 92.83          | 1  | 92.83       | 4.92    | 4       | 1.82           | 1  | 1.82        | 2.76    | 4       | 3.38           | 1  | 3.38        | 9       | 7       |
|                |                |    |             | 0.541   | 0.494   |                |    |             |         | 0.202   | 3150.          |    | 3150.       |         | 0.015   |
| A <sup>2</sup> | 10.22          | 1  | 10.22       | 3       | 9       | 1.42           | 1  | 1.42        | 2.15    | 6       | 71             | 1  | 71          | 12.95   | 6       |
|                |                |    |             |         | 0.094   | 0.153          |    | 0.153       | 0.233   | 0.649   |                |    |             | 0.274   | 0.622   |
| B <sup>2</sup> | 79.94          | 1  | 79.94       | 4.23    | 7       | 9              | 1  | 9           | 6       | 3       | 66.81          | 1  | 66.81       | 5       | 7       |
|                | 0.073          |    | 0.073       | 0.003   | 0.952   | 0.145          |    | 0.145       | 0.221   | 0.657   | 1573.          |    | 1573.       |         | 0.051   |
| C <sup>2</sup> | 5              | 1  | 5           | 9       | 7       | 9              | 1  | 9           | 4       | 8       | 77             | 1  | 77          | 6.47    | 7       |
| Residual       |                |    |             |         |         |                |    | 0.658       |         |         | 1216.          |    | 243.3       |         |         |
| Lack of Fit    | 94.38          | 5  | 18.88       |         |         | 3.29           | 5  | 8           |         |         | 84             | 5  | 7           |         |         |
| Pure Error     |                |    |             |         | 0.476   |                |    |             | 0.493   | 0.722   | 634.8          |    | 211.6       | 0.727   | 0.623   |
|                | 61.33          | 3  | 20.44       | 1.24    | 2       | 1.4            | 3  | 0.467       | 4       | 6       | 7              | 3  | 2           | 3       | 1       |
|                |                |    |             |         |         |                |    | 0.946       |         |         | 581.9          |    | 290.9       |         |         |
| Error          | 33.06          | 2  | 16.53       |         |         | 1.89           | 2  | 5           |         |         | 8              | 2  | 9           |         |         |
